# Supplementary material for: MDA5 with Complete CARD2 Region Inhibits the Early Replication of H9N2 AIV and Enhances the Immune Response during Vaccination
Source: MDPI journal article supplement (doi:10.3390/vaccines11101542), 2023-09-28
Supplement: s1 [file s1]

## Supplemental Figure legend

### Supplemental Figure 1

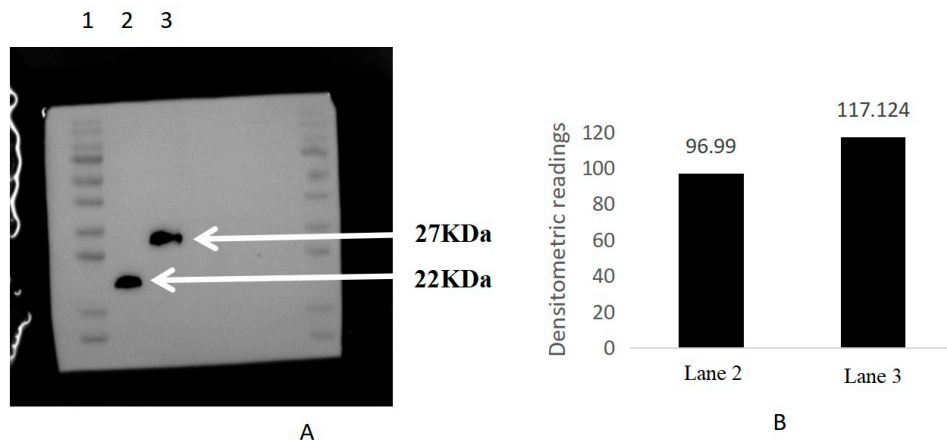

**Supplemental Figure 1. The eukaryotic expression identification of MDA5-1 and MDA5-2 protein.** (A) The whole blot (uncropped blots) showing all the bands with all molecular weight markers. Lane 1: Marker; Lane 2: The eukaryotic expression of MDA5-1 protein (22 KDa); Lane 3: The eukaryotic expression of MDA5-2 protein (27 KDa). (B) The densitometry analysis of each band in supplemental figure 1A.

### Supplemental Figure 2.

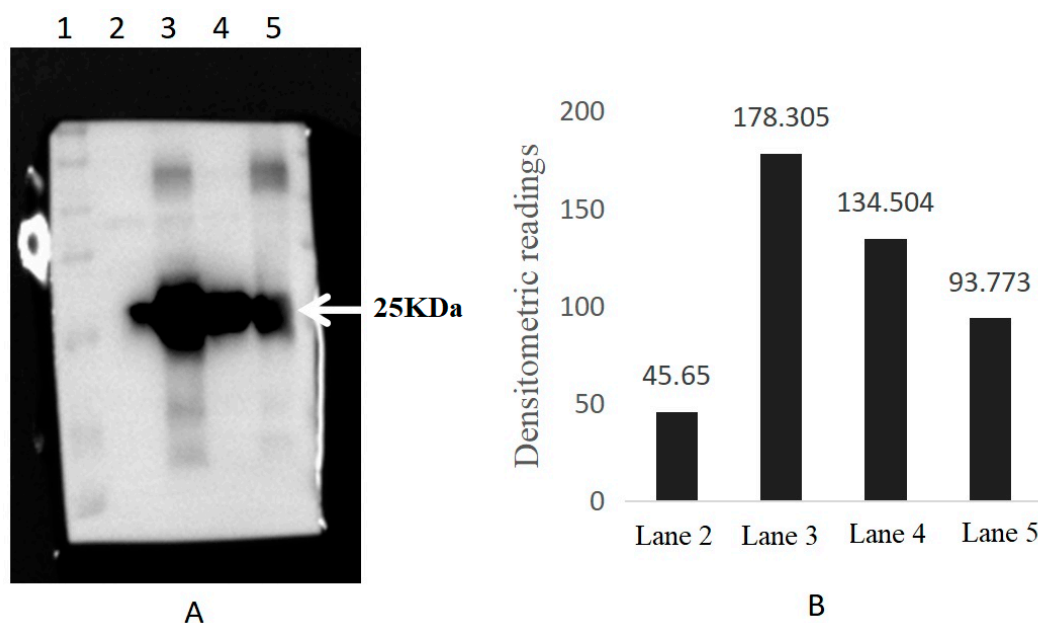

**Supplemental Figure 2. The expression identification of prokaryotic plasmids pET28a-His-MDA5-1.** (A) The whole blot (uncropped blots) showing all the bands with all molecular weight markers (25 KDa). Lane 1: Marker; Lane 2: Bacteria with recombinant plasmid before induction; Lane 3: Bacteria with recombinant plasmid after induction; Lane 4: Supernatant after ultrasound; Lane 5: Precipitation after ultrasound. (B) The densitometry analysis of each band in supplemental figure 2A.

**Supplemental Figure 3.**

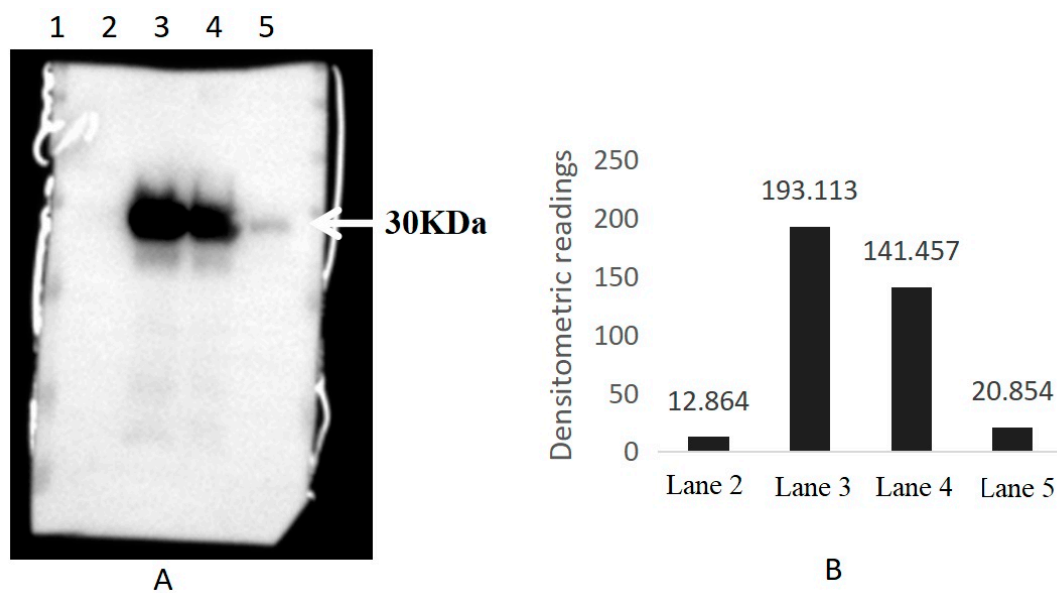

**Supplemental Figure 3.** The expression identification of prokaryotic plasmids pET28a-His-MDA5-2. (A) The whole blot (uncropped blots) showing all the bands with all molecular weight markers (30 KDa). Lane 1: Marker; Lane 2: Bacteria with recombinant plasmid before induction; Lane 3: Bacteria with recombinant plasmid after induction; Lane 4: Supernatant after ultrasound; Lane 5: Precipitation after ultrasound. (B) The densitometry analysis of each band in supplemental figure 3A.
